# Supplementary material
Source: PubMed Central journal article supplement (PMC4902607)
Supplement: supp_pp.16.00248_PP2016-00248R1_Supplemental_Material.pdf [file supp_pp.16.00248_PP2016-00248R1_Supplemental_Material.pdf]

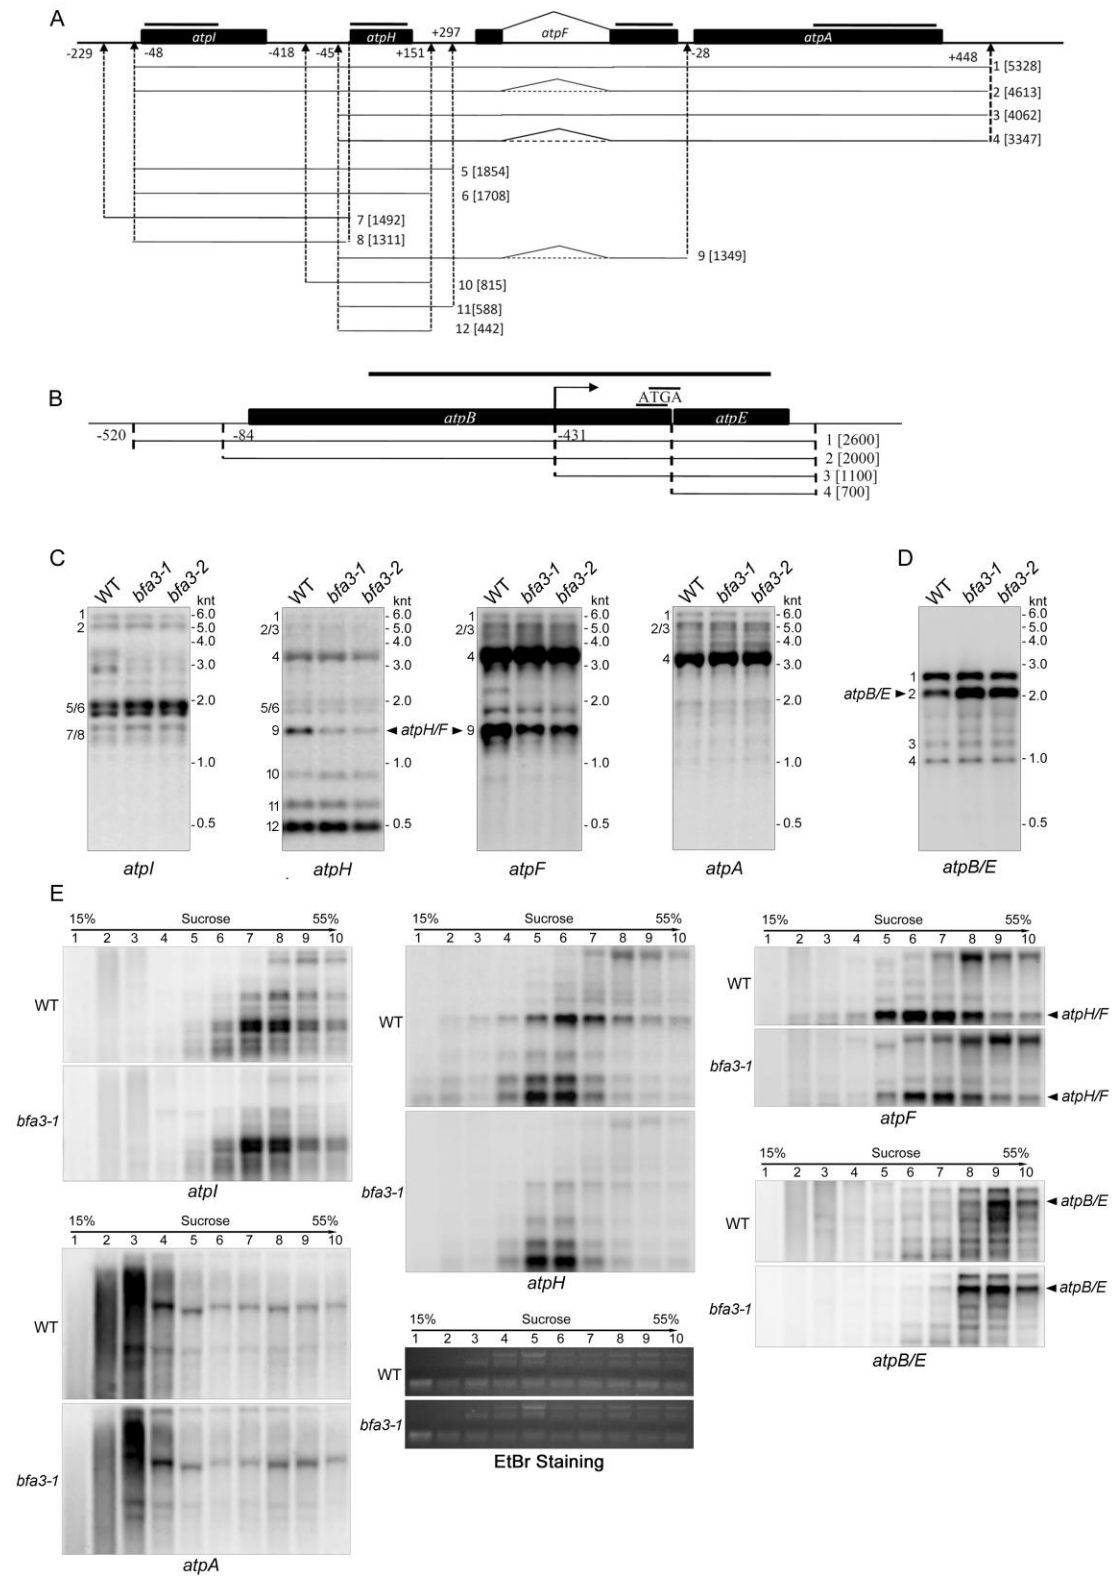

**Supplemental Figure S1.** RNA gel blot and polysome analysis.

(A, B) Schematic representation of the *atpI/H/F/A* (A) and *atpB/E* (B) operons. Transcript maps were generated based on previously reported data (Pfalz et al., 2009; Malik Ghulam et al., 2012). (C, D) RNA gel blot analysis of plastid mRNAs encoding

ATP synthase subunits in the WT and *bfa3* mutant. Total RNA (5 µg/lane) from the leaves of three-week-old plants was size fractionated on denaturing agarose gels and probed with DIG-labeled DNA probes corresponding to plastid *atpA*, *atpF*, *atpH*, *atpI* (C), and *atpB/E* (D) genes. The positions of RNA markers (knt, kilonucleotides) are shown. (E) Polysome association analyses of plastid mRNAs encoding ATP synthase subunits. Total extracts from wild-type and *bfa3-1* leaves were fractionated in 15–55% sucrose gradients under polysome-maintaining conditions. Ten fractions of equal volume were collected from the top to the bottom of the sucrose gradients, and equal proportions of the RNA purified from each fraction were analyzed by RNA gel blotting. rRNAs were detected by EtBr staining. The arrows above the panels indicate sucrose density gradients (from low to high).

```

                                     | Predicted cleavage site
AtBFA3 1 ---MA--TSPVQC--FSCNSHHHQREQSGSLWRLGSRVLV-SSSLWKLSPGSLHNRRLTLCVKGDPDPAFKKTVETDRMIDALRDAN-
GmBFA3 1 -MRINAFCVSVSASLYYFPNPH----GALLQDWKLRKHRFSKLTSEPL--NLSCKRRRTPTICANQEADEAFKKTVEIDRLIDMLRAN-
OsBFA3 1 -MSTAAA--ASTSLRPAQS--ALRLAGSPRRWCWGAPALSPARRAF----HADTRRRKTLTYATDKGPEESLKKTEVDRLIDMLRAN-
ZmBFA3 1 ---MATTA--ASTSLRPLSPS--PRLIASLPRRCWGWIPVQSGRSAP----HAQRRRRSTLLCAADKAPESLKKTEVDRLIDMLRAN-
SmBFA3 1 MATMAAASAFCSIRSSNGNH-WASGYVTRPVALRIHSIAE--P-----NLRMCSETRSNFCTICAAADSPQASQSSKEIDRLIDMLRST-
PpBFA3 1 -----MS-----RSTVHVVAASSTKIFRTEVDRLIDMLRST-
CrBFA3 1 -MQVSRANV---CARSSPVRVQAFSSCPVVRVSTCARVVRNSACR-----SAAQPRQRPSRFVGAARSELSDSLKPAALDPLDKLSSAKS

AtBFA3 88 PRQVEKIVVENILAFDEVFVIRLAARSPTCKSDDDKKDYEELATTVMITLVDCVVKTRKIEESTDLKGLLRPAIDG-VEEISWPPRDPFAINL
GmBFA3 86 PREIQKLVVENILAFNPFVWRLAARDTCKSDDDKKDYEELATTVMITLVDCVVKTRKIEESTDVLKGLKRVIDD-EGEIPWPPRDRQATL
OsBFA3 84 PRELDQIVVENVLAFDGFWVRLAARDLCKSDDDKKDYEELANVMNIVDRVHKTDKIEESTDVLKATISVMHE-GENATWPPRDEPAIKL
ZmBFA3 82 PRELDQIVVENVLAFDAGFWVRLAARDLCKSDDDKKDYEELANVMNIVDRVHKTDKIEESTDVLKATISVMHE-GD-VKWPFRDPDTKLL
SmBFA3 87 SQLLQIVAVENVLAFDKFWVRLAARDLCKSDDDKKDYEELANVMNIVDRVHKTDKIEESTDVLKATISVMHE-VAGSKNEIWPFRDEPAIQR
PpBFA3 36 YHMAQIVAVENVLAFDKFWVRLAARDLCKSDDDKKDYEELASQIMSLVVRIVSKTKIEESTDVLKATISVMHE-DNEIWPFRNEASLIE
CrBFA3 83 QQLLQIVAVENVLAFDKFWVRLAARDLCKSDDDKKDYEELASQIMSLVVRIVSKTKIEESTDVLKATISVMHE-QLADSGAVLQDILVAADDDKGE-WYDPLTD-DQVES

AtBFA3 182 MKKEITQREKREGQDDEGFLSEVNAQLRQAKEDKDKPGLAMLOKVLQLYASATILSKRSYAKKCNBTVKABHFLDTLTKAPEEQWNKLPVDGLTHG
GmBFA3 180 MKKEISQREKREGQDDEGFLSEVNAQLRQAKEDGDKPGLAMLOKVLQLYASAVLSKRSYAMKCKEVLKDBQLLETLIQAPEQEWSHLITNGLTHG
OsBFA3 178 MKKEISNREKREGQDDEGFLSEVNAQLRQAKQDGDKPGLOAMLOKVLQLYASNFKRSYAYKGGVIVPVSFLSEVHKAPENWNKLLDGLTVG
ZmBFA3 175 MKKEITRREKREGQDDEGFLSEVNAQLRQAKQDGDKPGLOAMLOKVLQLYASKSLKRSYAYKGGVIVPVSFLSEVHKAPENWNKLLDGLTVG
SmBFA3 182 VRKEMHRESGVLDDGFLSEVNAQLRQAKEDKDKPGLAMLOKVLQLYAAFLAKTSYAKRDGVVDEABELLENTISADSEAWDSMIRSGVDLG
PpBFA3 130 MRKEVEKRELENFLEDSFLSEVNAQLRQAKEDKDKPGLAMLOKVLQLYAACLSKRSYAMKRDGVVDKABELLEKMDVDBKWNDDLRRNGFYG
CrBFA3 158 VREAN-N-RHRDRLEBALSNAFWIKKSSBDG-PDGVVQLQDVLQLYAARQLATGE-----TEGVGAVNKLGLSQBQKQWTFPLRLQV--A

AtBFA3 277 KGDITPDEFSAVIKKRIERTLIRTEGGSYQORILTEYLKTEERANRIMKLLQG-----
GmBFA3 275 AGDISAEDLFAVLKKRIERVLRTEGGSYQORILTEYLKTEERABEIVQVLOGRFPQ---
OsBFA3 273 KGNVSPPEFYAVIKKRIERVLRTEGGSYQORILTEYLKTEERAREEVVKVLOGPTI---
ZmBFA3 270 KGDVSPDLYAVINIKKRIERVLRTEGGSYQORILTEYLKTEERAREEVVKVLOGPTI---
SmBFA3 277 GGPVKSVDLRKMAKKRIERTLIRTEGGSYQORILTEYLKTEERASVDMVVAAFSS-----
PpBFA3 225 GGPVPSDEFFKAVDRRIERTLIRTEGGSYQORILTEYLKTEERARASLTAAPQSSPSSR-
CrBFA3 241 EGQLTEAAMPMEALQRKMEGVVGLGLQSGSYAQRVQAEYLKTEERAKRSVFPQETAAASAPKQA

```

### Supplemental Figure S2. Alignment of BFA3 homologs.

Sequences were retrieved from GenBank and aligned with ClustalW2. Identical amino acids are shown as white letters on a black background, and similar amino acids are indicated as black letters on a gray background. The predicted cleavage site of AtBFA3 is indicated by an arrow above the sequence. AtBFA3 (AT2G21385, *Arabidopsis thaliana*), GmBFA3 (XP\_006592087.1, *Glycine max*), OsBFA3 (NP\_001063753.1, *Oryza sativa*), ZmBFA3 (ACG43670.1, *Zea mays*), SmBFA3 (XP\_002992058.1, *Selaginella moellendorffii*), PpBFA3 (XP\_001780245.1, *Physcomitrella patens*), CrBFA3 (XP\_001701296.1, *Chlamydomonas reinhardtii*)

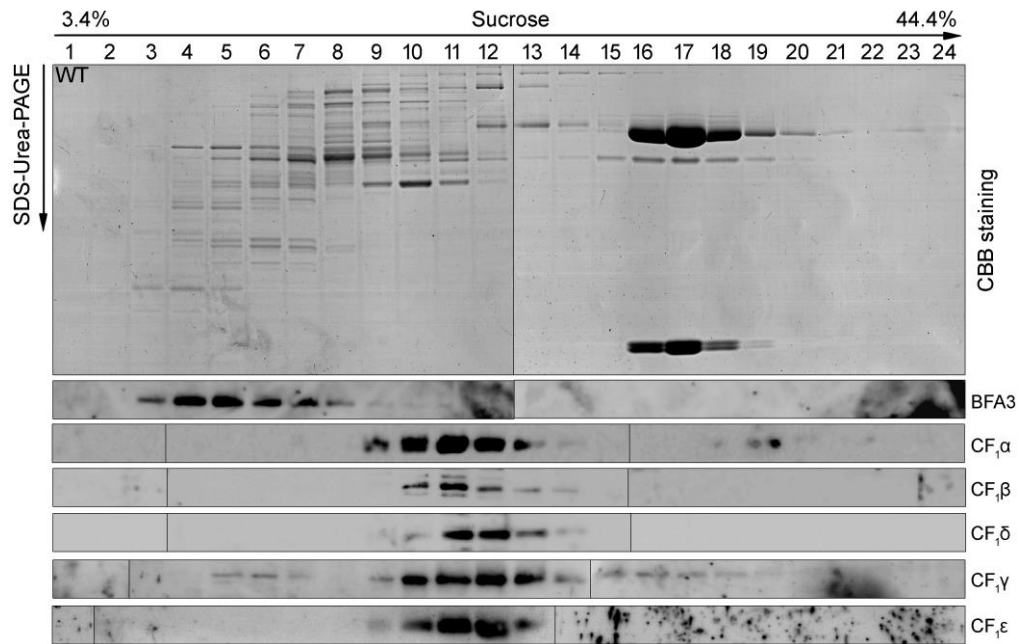

**Supplemental Figure S3.** Sucrose density gradient analysis of stromal proteins.

Stromal proteins isolated from wild-type (WT) leaves were fractionated by centrifugation in a linear 3.4–44.4% sucrose gradient. After ultracentrifugation, 24 fractions of equal volume were collected (numbered from top to bottom). ATP synthase subunits and BFA3 were identified by probing with the appropriate antibodies. The arrow above the panels indicates the sucrose density gradient (from low to high). For Coomassie Brilliant Blue (CBB) staining and each immunoblot, the figures were combined from two different gels of a single experiment.

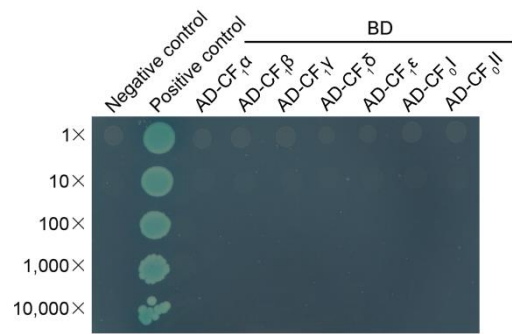

**Supplemental Figure S4.** Control for yeast two-hybrid analysis. Subunits of the CF<sub>1</sub> subcomplex as well as soluble parts of CF<sub>0</sub>I and CF<sub>0</sub>II were fused to pGADT7 and the resulting vectors were cotransformed with pGBKT7. AD, GAL4 activation domain; BD, GAL4 DNA-binding domain.

|                    |                                                                                           |    |
|--------------------|-------------------------------------------------------------------------------------------|----|
| AthCF <sub>β</sub> | MRINPTTSSNPEVSIREKKNLGRIAQIIIGFVLDVAFPPGRMKNIYNALVVKGRDITLQEQINVTCEVQC LGNNRRAVAVMSATBGL  | 85 |
| GmaCF <sub>β</sub> | MRINPTTSSGPEVSALEKKNLGRIAQIIIGFVLDVAFPPGRMKNIYNALVVKGRDITVGGQINVTCEVQC LGNNRRAVAVMSATBGL  | 85 |
| OsaCF <sub>β</sub> | MRTNPTTSSRPGVSTIEEKSTGRIDQIIIGFVLDVTFPPGKLFPIYNALVVKSRDITDGQINVTCEVQC LGNNRRAVAVMSATBGL   | 85 |
| ZmaCF <sub>β</sub> | MRTNPTTSSRPGVSTIEEKSVGRIDQIIIGFVLDVTFPPGKLFPIYNALVVKSRDITDGQINVTCEVQC LGNNRRAVAVMSATBGL   | 85 |
| SmoCF <sub>β</sub> | MPIIYNSLTVTGRNPAAGCEINVTCEVQC SLGNNRRAVAVMSATBGL                                          | 46 |
| PpaCF <sub>β</sub> | MKNDSTRTFGASTVLTKTQNIIGRISQIIIGFVLDVTFPPGRMKNIYNALVVKGRDITLQEQINVTCEVQC LGNNRRAVAVMSATBGL | 85 |
| CreCF <sub>β</sub> | MPFGILIFLITMSDSIETKNMGRIVQIIIGFVLDVFAKQVFNPIYNALVIRAKNSAGTEMAVTCEVQC LGNNRRAVAVMSATBGL    | 85 |
| SynCF <sub>β</sub> | MVAVKEATNVKGIITQVIGFVILIAQFESGKLFPIYNALVVKGRNSAGNEVAVTCEVQC LGNNRRAVAVMSATBGL             | 75 |
| NosCF <sub>β</sub> | MVITAEKRTNIGYITQIIIGFVVDVVFENGLKFCIYNALVIRKGTNEAGQQLNVTCEVQC LGNNRRAVAVMSATBGL            | 75 |
| TheCF <sub>β</sub> | MVISAERTNVFITQVIGFVVDVVFENGLKFCIYNALVIRKGTNEAGQQLNVTCEVQC LGNNRRAVAVMSATBGL               | 75 |
| RicCF <sub>β</sub> | MVITAEKRTNIGYITQIIIGFVVDVVFENGLKFCIYNALVIRKGTNEAGQQLNVTCEVQC LGNNRRAVAVMSATBGL            | 75 |

|                    |                                                                                     |     |
|--------------------|-------------------------------------------------------------------------------------|-----|
|                    | I                                                                                   |     |
|                    | mβ1      mβ2      mβ3      mβ4                                                      |     |
| AthCF <sub>β</sub> | VRGMDVVDIGAPP SVVPGGATLGRIFN LGPEVDNIGFVDTRITSPHRSAPAFIEIDTSLIFETGIKV DLLAPYRGGKIGL | 170 |
| GmaCF <sub>β</sub> | VRGMEVDIDGAPP SVVPGGATLGRIFN LGPEVDNIGFVDTRITSPHRSAPAFIEIDTSLIFETGIKV DLLAPYRGGKIGL | 170 |
| OsaCF <sub>β</sub> | VRGMEVDIDGAPP SVVPGGATLGRIFN LGPEVDNIGFVDTRITSPHRSAPAFIEIDTSLIFETGIKV DLLAPYRGGKIGL | 170 |
| ZmaCF <sub>β</sub> | VRGMEVDIDGAPP SVVPGGATLGRIFN LGPEVDNIGFVDTRITSPHRSAPAFIEIDTSLIFETGIKV DLLAPYRGGKIGL | 170 |
| SmoCF <sub>β</sub> | VRGMEVDIDGAPP SVVPGGATLGRIFN LGPEVDNIGFVDTRITSPHRSAPAFIEIDTSLIFETGIKV DLLAPYRGGKIGL | 131 |
| PpaCF <sub>β</sub> | VRGMDVVDIGAPP SVVPGGATLGRIFN LGPEVDNIGFVDTRITSPHRSAPAFIEIDTSLIFETGIKV DLLAPYRGGKIGL | 170 |
| CreCF <sub>β</sub> | VRGMEVDIDGAPP SVVPGGATLGRIFN LGPEVDNIGFVDTRITSPHRSAPAFIEIDTSLIFETGIKV DLLAPYRGGKIGL | 170 |
| SynCF <sub>β</sub> | VRGMDVVDIGAPP SVVPGGATLGRIFN LGPEVDNIGFVDTRITSPHRSAPAFIEIDTSLIFETGIKV DLLAPYRGGKIGL | 160 |
| NosCF <sub>β</sub> | VRGLEVDIDGAPP SVVPGGATLGRIFN LGPEVDNIGFVDTRITSPHRSAPAFIEIDTSLIFETGIKV DLLAPYRGGKIGL | 160 |
| TheCF <sub>β</sub> | VRGMEVDIDGAPP SVVPGGATLGRIFN LGPEVDNIGFVDTRITSPHRSAPAFIEIDTSLIFETGIKV DLLAPYRGGKIGL | 160 |
| RicCF <sub>β</sub> | VRGMEVDIDGAPP SVVPGGATLGRIFN LGPEVDNIGFVDTRITSPHRSAPAFIEIDTSLIFETGIKV DLLAPYRGGKIGL | 160 |

|                    |                                                                                       |     |
|--------------------|---------------------------------------------------------------------------------------|-----|
|                    | II-1                                                                                  |     |
|                    | mβ5      mβ6      mβ7mβ8      mβ9                                                     |     |
| AthCF <sub>β</sub> | FGGAGVGKTVLIMELINNIARKHGGVSVGGVGGERTREGNDLYMEMRESGVINECNLAE SKVALVYGMNEPPGARMRVGLTALT | 255 |
| GmaCF <sub>β</sub> | FGGAGVGKTVLIMELINNIARKHGGVSVGGVGGERTREGNDLYMEMRESGVINECNLAE SKVALVYGMNEPPGARMRVGLTALT | 255 |
| OsaCF <sub>β</sub> | FGGAGVGKTVLIMELINNIARKHGGVSVGGVGGERTREGNDLYMEMRESGVINECNLAE SKVALVYGMNEPPGARMRVGLTALT | 255 |
| ZmaCF <sub>β</sub> | FGGAGVGKTVLIMELINNIARKHGGVSVGGVGGERTREGNDLYMEMRESGVINECNLAE SKVALVYGMNEPPGARMRVGLTALT | 255 |
| SmoCF <sub>β</sub> | FGGAGVGKTVLIMELINNIARKHGGVSVGGVGGERTREGNDLYMEMRESGVINECNLAE SKVALVYGMNEPPGARMRVGLTALT | 216 |
| PpaCF <sub>β</sub> | FGGAGVGKTVLIMELINNIARKHGGVSVGGVGGERTREGNDLYMEMRESGVINECNLAE SKVALVYGMNEPPGARMRVGLTALT | 255 |
| CreCF <sub>β</sub> | FGGAGVGKTVLIMELINNIARKHGGVSVGGVGGERTREGNDLYMEMRESGVINECNLAE SKVALVYGMNEPPGARMRVGLTALT | 255 |
| SynCF <sub>β</sub> | FGGAGVGKTVLIMELINNIARKHGGVSVGGVGGERTREGNDLYMEMRESGVINECNLAE SKVALVYGMNEPPGARMRVGLTALT | 245 |
| NosCF <sub>β</sub> | FGGAGVGKTVLIMELINNIARKHGGVSVGGVGGERTREGNDLYMEMRESGVINECNLAE SKVALVYGMNEPPGARMRVGLTALT | 245 |
| TheCF <sub>β</sub> | FGGAGVGKTVLIMELINNIARKHGGVSVGGVGGERTREGNDLYMEMRESGVINECNLAE SKVALVYGMNEPPGARMRVGLTALT | 245 |
| RicCF <sub>β</sub> | FGGAGVGKTVLIMELINNIARKHGGVSVGGVGGERTREGNDLYMEMRESGVINECNLAE SKVALVYGMNEPPGARMRVGLTALT | 245 |

|                    |                                                                               |     |
|--------------------|-------------------------------------------------------------------------------|-----|
|                    | II-2                                                                          |     |
|                    | mβ10                                                                          |     |
| AthCF <sub>β</sub> | MAEYERDNNQDVLFDNIRFVQAG EVSALLGRMFAVGGQPTLETGGLQERITSTRKGSITSIQAVYVPADLLDPAPA | 340 |
| GmaCF <sub>β</sub> | MAEYERDNNQDVLFDNIRFVQAG EVSALLGRMFAVGGQPTLETGGLQERITSTRKGSITSIQAVYVPADLLDPAPA | 340 |
| OsaCF <sub>β</sub> | MAEYERDNNQDVLFDNIRFVQAG EVSALLGRMFAVGGQPTLETGGLQERITSTRKGSITSIQAVYVPADLLDPAPA | 340 |
| ZmaCF <sub>β</sub> | MAEYERDNNQDVLFDNIRFVQAG EVSALLGRMFAVGGQPTLETGGLQERITSTRKGSITSIQAVYVPADLLDPAPA | 340 |
| SmoCF <sub>β</sub> | MAEYERDNNQDVLFDNIRFVQAG EVSALLGRMFAVGGQPTLETGGLQERITSTRKGSITSIQAVYVPADLLDPAPA | 301 |
| PpaCF <sub>β</sub> | MAEYERDNNQDVLFDNIRFVQAG EVSALLGRMFAVGGQPTLETGGLQERITSTRKGSITSIQAVYVPADLLDPAPA | 340 |
| CreCF <sub>β</sub> | MAEYERDNNQDVLFDNIRFVQAG EVSALLGRMFAVGGQPTLETGGLQERITSTRKGSITSIQAVYVPADLLDPAPA | 340 |
| SynCF <sub>β</sub> | MAEYERDNNQDVLFDNIRFVQAG EVSALLGRMFAVGGQPTLETGGLQERITSTRKGSITSIQAVYVPADLLDPAPA | 330 |
| NosCF <sub>β</sub> | MAEYERDNNQDVLFDNIRFVQAG EVSALLGRMFAVGGQPTLETGGLQERITSTRKGSITSIQAVYVPADLLDPAPA | 330 |
| TheCF <sub>β</sub> | MAEYERDNNQDVLFDNIRFVQAG EVSALLGRMFAVGGQPTLETGGLQERITSTRKGSITSIQAVYVPADLLDPAPA | 330 |
| RicCF <sub>β</sub> | MAEYERDNNQDVLFDNIRFVQAG EVSALLGRMFAVGGQPTLETGGLQERITSTRKGSITSIQAVYVPADLLDPAPA | 330 |

|                    |                                                                                   |     |
|--------------------|-----------------------------------------------------------------------------------|-----|
|                    | II-3                                                                              |     |
|                    | mβ11      mβ12                                                                    |     |
| AthCF <sub>β</sub> | TFFAHLDTTVLSRGLARAGIYPAVDPLSTSNLQFRIVGGEHYETACQVKCTLQRYKE QDIAAILGLDELSEEDRLVVRAR | 425 |
| GmaCF <sub>β</sub> | TFFAHLDTTVLSRGLARAGIYPAVDPLSTSNLQFRIVGGEHYETACQVKCTLQRYKE QDIAAILGLDELSEEDRLVVRAR | 425 |
| OsaCF <sub>β</sub> | TFFAHLDTTVLSRGLARAGIYPAVDPLSTSNLQFRIVGGEHYETACQVKCTLQRYKE QDIAAILGLDELSEEDRLVVRAR | 425 |
| ZmaCF <sub>β</sub> | TFFAHLDTTVLSRGLARAGIYPAVDPLSTSNLQFRIVGGEHYETACQVKCTLQRYKE QDIAAILGLDELSEEDRLVVRAR | 425 |
| SmoCF <sub>β</sub> | TFFAHLDTTVLSRGLARAGIYPAVDPLSTSNLQFRIVGGEHYETACQVKCTLQRYKE QDIAAILGLDELSEEDRLVVRAR | 386 |
| PpaCF <sub>β</sub> | TFFAHLDTTVLSRGLARAGIYPAVDPLSTSNLQFRIVGGEHYETACQVKCTLQRYKE QDIAAILGLDELSEEDRLVVRAR | 425 |
| CreCF <sub>β</sub> | TFFAHLDTTVLSRGLARAGIYPAVDPLSTSNLQFRIVGGEHYETACQVKCTLQRYKE QDIAAILGLDELSEEDRLVVRAR | 425 |
| SynCF <sub>β</sub> | TFFAHLDTTVLSRGLARAGIYPAVDPLSTSNLQFRIVGGEHYETACQVKCTLQRYKE QDIAAILGLDELSEEDRLVVRAR | 415 |
| NosCF <sub>β</sub> | TFFAHLDTTVLSRGLARAGIYPAVDPLSTSNLQFRIVGGEHYETACQVKCTLQRYKE QDIAAILGLDELSEEDRLVVRAR | 415 |
| TheCF <sub>β</sub> | TFFAHLDTTVLSRGLARAGIYPAVDPLSTSNLQFRIVGGEHYETACQVKCTLQRYKE QDIAAILGLDELSEEDRLVVRAR | 415 |
| RicCF <sub>β</sub> | TFFAHLDTTVLSRGLARAGIYPAVDPLSTSNLQFRIVGGEHYETACQVKCTLQRYKE QDIAAILGLDELSEEDRLVVRAR | 415 |

|                    |                                                                        |     |
|--------------------|------------------------------------------------------------------------|-----|
| AthCF <sub>β</sub> | KIERFLSQFFHVAEVVGTGPGKYVGLAETIRGFKLILSGEDELPEQAFYIVGNIDEATAKATNEMESKIK | 497 |
| GmaCF <sub>β</sub> | KIERFLSQFFHVAEVVGTGPGKYVGLAETIRGFKLILSGEDELPEQAFYIVGNIDEATAKATNEMESKIK | 497 |
| OsaCF <sub>β</sub> | KIERFLSQFFHVAEVVGTGPGKYVGLAETIRGFKLILSGEDELPEQAFYIVGNIDEATAKATNEMESKIK | 497 |
| ZmaCF <sub>β</sub> | KIERFLSQFFHVAEVVGTGPGKYVGLAETIRGFKLILSGEDELPEQAFYIVGNIDEATAKATNEMESKIK | 497 |
| SmoCF <sub>β</sub> | KIERFLSQFFHVAEVVGTGPGKYVGLAETIRGFKLILSGEDELPEQAFYIVGNIDEATAKATNEMESKIK | 451 |
| PpaCF <sub>β</sub> | KIERFLSQFFHVAEVVGTGPGKYVGLAETIRGFKLILSGEDELPEQAFYIVGNIDEATAKATNEMESKIK | 494 |
| CreCF <sub>β</sub> | KIERFLSQFFHVAEVVGTGPGKYVGLAETIRGFKLILSGEDELPEQAFYIVGNIDEATAKATNEMESKIK | 491 |
| SynCF <sub>β</sub> | KIERFLSQFFHVAEVVGTGPGKYVGLAETIRGFKLILSGEDELPEQAFYIVGNIDEATAKATNEMESKIK | 483 |
| NosCF <sub>β</sub> | KIERFLSQFFHVAEVVGTGPGKYVGLAETIRGFKLILSGEDELPEQAFYIVGNIDEATAKATNEMESKIK | 482 |
| TheCF <sub>β</sub> | KIERFLSQFFHVAEVVGTGPGKYVGLAETIRGFKLILSGEDELPEQAFYIVGNIDEATAKATNEMESKIK | 482 |
| RicCF <sub>β</sub> | KIERFLSQFFHVAEVVGTGPGKYVGLAETIRGFKLILSGEDELPEQAFYIVGNIDEATAKATNEMESKIK | 483 |

III

**Supplemental Figure S5.** Alignment of CF<sub>1</sub>β protein sequences.

Amino acid alignment of the CF<sub>1</sub>β subunits. Sequences were retrieved from GenBank and aligned with ClustalW2. Identical amino acids are shown as white letters on a black background, and similar amino acids are indicated as black letters on a gray background.

background. Three domains of CF<sub>1</sub>β (I, II, and III) and three regions of domain II (II-1, II-2, and II-3) are indicated by different colored lines below the sequences. The positions of the point mutations (mβ1-mβ12) are indicated above the sequences. AthCF<sub>1</sub>β (ATCG00480, *Arabidopsis thaliana*), GmaCF<sub>1</sub>β (YP\_538748.1, *Glycine max*), OsaCF<sub>1</sub>β (YP\_052756.1, *Oryza sativa*), ZmaCF<sub>1</sub>β (NP\_043032.1, *Zea mays*), SmoCF<sub>1</sub>β (YP\_003097494.1, *Selaginella moellendorffii*), PpaCF<sub>1</sub>β (NP\_904195.1, *Physcomitrella patens*), CreCF<sub>1</sub>β (NP\_958414.1, *Chlamydomonas reinhardtii*), SynCF<sub>1</sub>β (WP\_010872712.1, *Synechocystis* sp. PCC 6803), NosCF<sub>1</sub>β (WP\_010999165.1, *Nostoc* sp. PCC 7120), TheCF<sub>1</sub>β (NP\_681315.1, *Thermosynechococcus elongatus* BP-1), RinCF<sub>1</sub>β (CDN15135.1, *Richelia intracellularis*).

**Supplemental Table S1. Phylogenetic analysis of BFA3 and CF<sub>1</sub>β**

| Group                        | Phylum                        | Species                                     | BFA3                                      | CF <sub>1</sub> β |                |    |       |       |       |       |
|------------------------------|-------------------------------|---------------------------------------------|-------------------------------------------|-------------------|----------------|----|-------|-------|-------|-------|
|                              |                               |                                             |                                           | ID                | β5             | β6 | β7    | β8    | β9    |       |
| Prokaryotic Algae            | Cyanophyta                    | <i>Synechocystis</i> sp. PCC 6803           | -                                         | WP_010872712.1    | IM             | IQ | N     | I     | ADKPE |       |
|                              |                               | <i>Nostoc</i> sp. PCC 7120                  | -                                         | WP_010999165.1    | IM             | TQ | N     | I     | NENLN |       |
|                              |                               | <i>Thermosynechococcus elongatus</i> BP-1   | -                                         | NP_681315.1       | IM             | TQ | N     | I     | KDDPS |       |
|                              |                               | <i>Richelia intracellularis</i>             | -                                         | CDN15135.1        | IM             | TQ | N     | I     | AENLN |       |
|                              |                               | <i>Microcystis aeruginosa</i>               | -                                         | WP_002760447.1    | IM             | IQ | N     | I     | ADNPE |       |
|                              |                               | <i>Spirulina subsals</i>                    | -                                         | WP_017303185.1    | IM             | IN | N     | I     | PDNLG |       |
|                              |                               | <i>Scytonema tolypothrichoides</i>          | -                                         | WP_048869444.1    | IM             | TQ | N     | I     | KDNLN |       |
|                              |                               | <i>Fischerella muscicola</i>                | -                                         | WP_016870242.1    | IM             | TQ | N     | I     | KDNLN |       |
|                              |                               | <i>Calothrix</i> sp. 336/3                  | -                                         | WP_035156122.1    | IM             | TE | N     | I     | KDNLN |       |
|                              |                               | <i>Leptolyngbya boryana</i>                 | -                                         | WP_017286658.1    | IM             | TN | N     | I     | KDNLN |       |
|                              |                               | <i>Chlorogloeopsis fritschii</i>            | -                                         | WP_016874105.1    | IM             | TE | N     | I     | NDNLN |       |
|                              |                               | <i>Stigonematales</i>                       | -                                         | WP_026721253.1    | IM             | TQ | N     | I     | KDNLN |       |
|                              |                               | <i>Mastigocladopsis repens</i>              | -                                         | WP_017319445.1    | IM             | TE | N     | I     | KDNLN |       |
|                              |                               | <i>Synechococcus</i> sp. NKBG15041c         | -                                         | WP_024544923.1    | IM             | TK | N     | I     | AENLN |       |
|                              |                               | <i>Tolypothrix campylonemoides</i>          | -                                         | WP_041040374.1    | IM             | TQ | N     | I     | KDNLN |       |
|                              |                               | <i>Raphidiopsis brookii</i>                 | -                                         | WP_009342625.1    | IM             | TQ | N     | I     | KENLN |       |
|                              |                               | <i>Chamaesiphon minutus</i>                 | -                                         | WP_015160618.1    | IM             | TN | N     | M     | KDNLN |       |
|                              |                               | <i>Anabaena cylindrica</i>                  | -                                         | WP_015212783.1    | IM             | TQ | N     | M     | KDNLN |       |
|                              |                               | <i>Chroococcales cyanobacterium</i> CENA595 | -                                         | WP_045055788.1    | IM             | IN | N     | K     | EENIG |       |
|                              |                               | <i>Planktothricoides</i> sp. SR001          | -                                         | WP_054465960.1    | -              | II | KA    | S     | K     | EKNLS |
|                              |                               | <i>Oscillatoria</i> sp. PCC 10802           | -                                         | WP_017716567.1    | -              | II | KA    | N     | K     | EKNLG |
|                              |                               | <i>Gloeocapsa</i> sp. PCC 7428              | -                                         | WP_015191148.1    | -              | II | KE    | N     | K     | EENLN |
|                              |                               | Prochlorophyta                              | <i>Prochlorothrix hollandica</i>          | -                 | WP_017713442.1 | LI | KE    | N     | K     | EKNIS |
|                              |                               |                                             | <i>Prochlorococcus</i> sp. W2             | -                 | WP_019475342.1 | LI | KE    | E     | K     | ADDLT |
|                              |                               | Rhodophyta                                  | <i>Porphyridium purpureum</i>             | -                 | YP_008965686.1 | LI | KA    | M     | R     | ASNLA |
|                              |                               |                                             | <i>Bangia fuscopurpurea</i>               | -                 | AKE98860.1     | LI | KA    | M     | K     | ADNLK |
|                              |                               |                                             | <i>Gracilariopsis lemaneiformis</i>       | -                 | AJO68470.1     | LI | KA    | E     | K     | ASDLK |
|                              |                               |                                             | <i>Cyanidioschyzon merolae</i> strain 10D | -                 | NP_849101.1    | LI | KA    | E     | K     | SQNLK |
| <i>Porphyra purpurea</i>     | -                             |                                             | NP_053869.1                               | LI                | KA             | M  | K     | EDNLK |       |       |
| <i>Gracilaria salicornia</i> | -                             |                                             | YP_009019644.1                            | LI                | KA             | E  | K     | ANNLK |       |       |
| <i>Chondrus crispus</i>      | -                             |                                             | YP_007627419.1                            | LI                | KA             | E  | K     | ADKLT |       |       |
| Phaeophyta                   | <i>Ectocarpus siliculosus</i> | CBJ49272.1                                  | YP_003289267.1                            | LI                | KA             | M  | K     | EKSLL |       |       |
|                              | <i>Sphacelaria plumigera</i>  | -                                           | BAR97500.1                                | LI                | KA             | M  | K     | ETNLL |       |       |
| Bacillariophyta              | <i>Undaria pinnatifida</i>    | -                                           | YP_009182549.1                            | LI                | KA             | M  | K     | EKNLL |       |       |
|                              | <i>Coscinodiscus radiatus</i> | -                                           | YP_009028893.1                            | LI                | KA             | E  | K     | ENNFK |       |       |
| Eukaryotic Algae             | Cryptophyta                   | <i>Biddulphia tridens</i>                   | -                                         | AKF18280.1        | LI             | KA | E     | K     | EKNFP |       |
|                              |                               | <i>Phaeodactylum tricorutum</i> CCAP 1055/1 | XP_002181618.1                            | YP_874407.1       | LI             | KA | E     | K     | EKNFA |       |
|                              | Euglenophyta                  | <i>Guillardia theta</i>                     | XP_005819851.1                            | ALG63579.1        | LI             | KA | M     | K     | ESNLG |       |
|                              |                               | <i>Teleaulax amphioxeia</i>                 | -                                         | YP_009159237.1    | LI             | KA | M     | K     | EDNLS |       |
|                              | Charophyta                    | <i>Cryptomonas paramecium</i>               | -                                         | YP_003359241.1    | LI             | KA | N     | L     | LENLC |       |
|                              |                               | <i>Euglenaformis proxima</i>                | -                                         | YP_009032763.1    | LI             | KA | Q     | K     | SGNLQ |       |
|                              |                               | <i>Trachelomonas volvocina</i>              | -                                         | YP_009145498.1    | LI             | KA | Q     | K     | SSNLK |       |
|                              | Chlorophyta                   | <i>Cryptoglena skujai</i>                   | -                                         | YP_009145387.1    | LI             | KA | Q     | K     | SSNLK |       |
|                              |                               | <i>Chara vulgaris</i>                       | -                                         | YP_635746.1       | LI             | KA | M     | K     | ENISE |       |
|                              | Gymnosperm                    | <i>Nitella axilliformis</i>                 | -                                         | AIC74296.1        | LI             | KA | M     | K     | QENIS |       |
| <i>Tolypella boldii</i>      |                               | -                                           | AIC74260.1                                | LI                | KA             | M  | K     | QENIS |       |       |
| Angiosperm                   | Angiospermae                  | <i>Chlamydomonas reinhardtii</i>            | XP_001701296.1                            | NP_958414.1       | LI             | KA | T     | K     | EKNLS |       |
|                              |                               | <i>Coccomyxa subellipsoidea</i> C-169       | EIE21223.1                                | YP_004222003.1    | LI             | KA | A     | K     | EDNLS |       |
|                              |                               | <i>Chlorella variabilis</i>                 | EFN59214.1                                | YP_004347820.1    | LI             | KA | M     | K     | ESNLS |       |
|                              |                               | <i>Volvox carteri f. nagariensis</i>        | XP_002947163.1                            | ACY05995.1        | LI             | KA | T     | K     | EKNLS |       |
|                              |                               | <i>Auxenochlorella protothecoides</i>       | XP_011400029.1                            | YP_009019317.1    | LI             | KA | M     | K     | ESNIA |       |
|                              |                               | <i>Bathycoccus prasinos</i>                 | XP_007509545.1                            | YP_009056877.1    | LI             | KA | Q     | C     | KGNLG |       |
|                              |                               | <i>Ostreococcus tauri</i>                   | XP_003082051.1                            | AGW30608.1        | LI             | KA | Q     | C     | TANLA |       |
|                              |                               | <i>Physcomitrella patens</i>                | XP_001780245.1                            | NP_904195.1       | LI             | KA | M     | K     | EENIS |       |
|                              |                               | <i>Selaginella moellendorffii</i>           | XP_002964112.1                            | YP_003097494.1    | LI             | KA | M     | K     | AQNIS |       |
|                              |                               | <i>Picea sitchensis</i>                     | ABK27019.1                                | YP_002905096.1    | LI             | KA | M     | K     | EQKIS |       |
| Angiosperm                   | Angiospermae                  | <i>Oryza sativa</i>                         | XP_015611535.1                            | YP_052756.1       | LI             | KA | M     | K     | EKNLE |       |
|                              |                               | <i>Zea mays</i>                             | ACG43670.1                                | NP_043032.1       | LI             | KA | M     | K     | EKNIE |       |
|                              |                               | <i>Arabidopsis thaliana</i>                 | AT2G21385                                 | ATCG00480         | LI             | KA | M     | K     | EQNLA |       |
|                              |                               | <i>Glycine max</i>                          | XP_006592087.1                            | YP_538748.1       | LI             | KA | M     | K     | EQNIA |       |
|                              |                               | <i>Eutrema salsugineum</i>                  | XP_006404584.1                            | YP_009175682.1    | LI             | KA | M     | K     | EQNLA |       |
|                              |                               | <i>Populus trichocarpa</i>                  | XP_002306131.2                            | YP_001109508.1    | LI             | KA | M     | K     | EENIA |       |
|                              |                               | <i>Tarenaya hassleriana</i>                 | XP_010555273.1                            | AAK72746.1        | LI             | KA | M     | K     | EQNLA |       |
|                              |                               | <i>Prunus persica</i>                       | XP_007199184.1                            | YP_004021672.1    | LI             | KA | M     | K     | EQNIA |       |
|                              |                               | <i>Prunus mume</i>                          | XP_008236971.1                            | YP_009020045.1    | LI             | KA | M     | K     | EQNIA |       |
|                              |                               | <i>Citrus sinensis</i>                      | XP_006487331.1                            | YP_740482.1       | LI             | KA | M     | K     | DQNLS |       |
| <i>Gossypium raimondii</i>   | XP_012436293.1                | YP_005087700.1                              | LI                                        | KA                | M              | K  | EQNLA |       |       |       |



BFA3 and CF1 $\beta$  sequence searches were performed at the NCBI Blast server (<http://www.ncbi.nlm.nih.gov/BLAST/>). “-” indicates no homolog was found during the blast search. The critical CF1 $\beta$  sites (CF1 $\beta$ 5, CF1 $\beta$ 8, and CF1 $\beta$ 9) for BFA3 binding are in blue. The highly conserved residues in CF1 $\beta$ 9 are in red.

## **Supplemental Table S2.** Primers used in this work

The following primers were used to detect T-DNA insertion sites:

LBa1: 5' TGGTTCACGTAGTGGGCCATCG 3'

BFA3-sense: 5' TCTGAATTCTCTGGACTCCATTTGAACCG 3'

BFA3-anti: 5' GAGGTCGACCATAATTTTCATTAGCCCTGG 3'

The following primers were used for complementation vector construction:

BFA3-Com-sense: 5' GTCGAATTCCTTGTATGTAATGTC 3'

BFA3-Com-anti: 5' ACGGTCGACACCCTGGAGTAATTTTC 3'

Pr-RbcS-sense: 5' AGATCTAGATGGCTTCTCTATGCTCTC 3'

Pr-RbcS-anti: 5' AGCCTCGAGGGAATCGGTAAGGTCAG 3'

SynATPB-sense: 5' ATACTCGAGATGGTAGCCGTAAAAG 3'

SynATPB-anti: 5' TATACTAGTTTAACCCTCTTTGAGCTTGGCAC 3'

The following primers were used for RT-PCR:

BFA3-RT-sense: 5' TTGGATAAGACTAGCAGCTAGGTC 3'

BFA3-RT-anti: 5' GAGGTCGACCATAATTTTCATTAGCCCTGG 3'

ACT8-sense: 5' AGTGGTCGTACAACCGGTATTGT 3'

ACT8-anti: 5' GAGGATAGCATGTGGAAGTACTGAGAA 3'

The following primers were used to prepare hybridization probes for Northern analysis:

ATPH-Northern-sense: 5' ATGAATCCACTGGTTTCTG 3'

ATPH-Northern-anti: 5' AAAGCGCTAATGCTACAAC 3'

ATPI-Northern-sense: 5' ATCATGTTCCATCAACACAC 3'

ATPI-Northern-anti: 5' CCGCATAAAAATAGGCTAC 3'

ATPA-Northern-sense: 5' GTACCGTGAACAACACACT 3'

ATPA-Northern-anti: 5' GCTTTATCGAGATCAGAAG 3'

ATPF-Northern-sense: 5' TTAGATAACCGAAAGCAGAGG 3'

ATPF-Northern-anti: 5' TTCATCGTACCAAACATCCC 3'

ATPF-in-Northern-sense: 5' TCAAGAATAGGCTGGATTACCCAG 3'

ATPF-in-Northern-anti: 5' TTTGGCTCTCATGCTCACTTATTCC 3'

ATPB/E-Northern-sense: 5' AAATTGGACTATTCGGTGG 3'

ATPB/E-Northern-anti: 5' AAATCGTATTGAGAGCCTCG 3'

The following primers were used for yeast two-hybrid vector construction:

BFA3-BD-sense: 5' TCTGAATTCTCTGGACTCCATTTGAACCG 3'

BFA3-BD-anti: 5' GATGGATCCATAATTTTCATTAGCCCTGGAC 3'

ATPA-AD-sense: 5' ACTCATATGATGGTAACCATTAGAGCCGAC 3'

ATPA-AD-anti: 5' AGCGTCGACTACTTTCTCTGAAGTAGG 3'

ATPB-AD-sense: 5' CGCGAATTCATGAGAACAATCCTAC 3'

ATPB-AD-anti: 5' GCGCTCGAGTTTCTTCAATTTACTC 3'

ATPC-AD-sense: 5' CCACATATGGCGTCTCTTCGTGAG 3'

ATPC-AD-anti: 5' ATCCTCGAGAACCTGTGCATTAGCTC 3'

ATPD-AD-sense: 5' ATACATATGGCCACCGCAGCATCAAG 3'

ATPD-AD-anti: 5' GCGGAATTCAGTAGCTAATTGAATCTCACC 3'  
ATPE-AD-sense: 5' CGACATATGATGACCTTAAATCTTTG 3'  
ATPE-AD-anti: 5' TATGAATTCAATCGTATTGAGAGCCTCG 3'  
ATPF-AD-sense: 5' GCGGGATCCATGATTTATTAGATAACCG 3'  
ATPF-AD-anti: 5' AGTCTCGAGATCAGTTATTTCTTTC 3'  
ATPG-AD-sense: 5' TATGAATTCCTGCTTGGTAACTTCATGG 3'  
ATPG-AD-anti: 5' GATGGATCCAGAAGGAAGAACCTTCTTGACAAT 3'  
ATPBI-AD-sense: 5' CGCGAATTCATGAGAACAAATCCTAC 3'  
ATPBI-AD-anti: 5' ACTCTCGAGATTTCCCATATCAACCAC 3'  
ATPBII-AD-sense: 5' ATGGAATTCCTCTAAGTGTTCAG 3'  
ATPBII-AD-anti: 5' AACCTCGAGAGGTTGTAGCATAGTTG 3'  
ATPBIII-AD-sense: 5' CTAGAATTCCGAATCGTTGGCGAG 3'  
ATPBIII-AD-anti: 5' GCGCTCGAGTTTCTTCAATTTACTC 3'  
ATPBII-1-AD-sense: 5' ATGGAATTCCTCTAAGTGTTCAG 3'  
ATPBII-1-AD-anti: 5' AATCTCGAGCCCACGACGATAAG 3'  
ATPBII-2-AD-sense: 5' CGTGAATTCGAAAAATTGGACTATTTCGG 3'  
ATPBII-2-AD-anti: 5' GCGCTCGAGGATATTGTTCGATAAATAG 3'  
ATPBII-3-AD-sense: 5' GATGAATTCTTCCGTTTCGTACAAGC 3'  
ATPBII-3-AD-anti: 5' AACCTCGAGAGGTTGTAGCATAGTTG 3'  
SynATPB-AD-sense: 5' GCAGAATTCATGGTAGCCGTAAGAAGCAAC 3'  
SynATPB-AD-anti: 5' TTTGTTCGACACCCTCTTTGAGCTTGGCAC 3'

The following primers used for protein expression vectors construction:

BFA3-GFP-sense: 5' TTCTCTAGAATGGCGGCAATATCCCTG 3'  
BFA3-GFP-anti: 5' TTACCGCGGTAACCCTGGAGTAATTTTCAT 3'  
ATP11-GFP-sense: 5' ACCGGATCCATGAGAAGAATCGTCG 3'  
ATP11-GFP-anti: 5' TCCCCGCGGCACAGAAGAGGCATAT 3'  
BFA3-Ab-sense: 5' TCTGAATTCTCTGGACTCCATTTGAACCG 3'  
BFA3-Ab-anti: 5' GAGGTCGACCATAATTTATTAGCCCTGG 3'  
BFA3-GST-sense: 5' TCTGAATTCTCTGGACTCCATTTGAACCG 3'  
BFA3-GST-anti: 5' GAGGTCGACCATAATTTATTAGCCCTGG 3'  
ATPA-MBP-sense: 5' ACTCATATGATGGTAACCATTAGAGCCGAC 3'  
ATPA-MBP-anti: 5' AGCGTCGACTACTTTCTCCTGAAGTAGG 3'  
ATPB-MBP-sense: 5' GCGCATATGATGAGAACAAATCCTAC 3'  
ATPB-MBP-anti: 5' CGCGTCGACTTTCTTCAATTTACTC 3'  
ATPC-MBP-sense: 5' CCACATATGGCGTCTCTTCGTGAG 3'  
ATPC-MBP-anti: 5' ATCCTCGAGAACCTGTGCATTAGCTC 3'  
ATPD-MBP-sense: 5' ATACATATGGCCACCGCAGCATCAAG 3'  
ATPD-MBP-anti: 5' GCGGAATTCAGTAGCTAATTGAATCTCACC 3'  
ATPE-MBP-sense: 5' CGACATATGATGACCTTAAATCTTTG 3'  
ATPE-MBP-anti: 5' TATGAATTCAATCGTATTGAGAGCCTCG 3'  
ATPF-MBP-sense: 5' GCGGTTCGACGATTTATTAGATAACCG 3'  
ATPF-MBP-anti: 5' CGCGAATTCATCAGTTATTTCTTTC 3'  
ATPG-MBP-sense: 5' TATGTTCGACCCGCTTGGTAACTTCATGG 3'

ATPG-MBP-anti: 5' GCGGAATTCAGAAGGAAGAACCTTCTTGAC 3'

The following primers were used for mutagenesis of *SynATPB* and *AthATPB*:

SynATPB1-sense: 5' TTAGGCCCCGTGGATACTCGTACAACCTTCTCCATTACCCGTCCC  
3'

SynATPB1-anti: 5' AGAAGTTGTACGAGTATCCACGGGGCCTAAGTTGTCAACAGGCTC  
3'

SynATPB2-sense: 5' TCTGCTCCCGCTTTTATAGAATTGGAAACCAAGCCC 3'

SynATPB2-anti: 5' TTCTATAAAAGCGGGAGCAGAACGGTGAATGGGGAAAG 3'

SynATPB3-sense: 5' TGGTGGATTTGGATACCAAGTTGCAAGTATTTGAAACC 3'

SynATPB3-anti: 5' CAAATACTTGCAACTTGGTATCCAAATCCACCAATTTGGG 3'

SynATPB4-sense: 5' TGCTTGCTCCCTACCGTCGTGGTGGCAAATCGGTC 3'

SynATPB4-anti: 5' TTTGCCACCACGACGGTAGGGAGCAAGCAGGTCAATTAC 3'

SynATPB5-sense: 5' GGGCAAACCGTACTCATCATGGAATTGATTAAC 3'

SynATPB5-anti: 5' GTTAATCAATTCCATGATGAGTACGGTTTTGCC 3'

SynATPB6-sense: 5' TTAACAACATCGCCAAAGCACATGGTGGTGTATC 3'

SynATPB6-anti: 5' GATACACCACCATGTGCTTTGGCGATGTTGTAA 3'

SynATPB7-sense: 5' GGAATGACCTCTACATGGAAATGATCGAATCCAACGTAATC 3'

SynATPB7-anti: 5' GATTACGTTGGATTCGATCATTTCCATGTAGAGGTCATTCC 3'

SynATPB8-sense: 5' GGAATGACCTCTACAACGAAATGAAGGAATCCAACGTAATC 3'

SynATPB8-anti: 5' GATTACGTTGGATTCCTTCATTTTCGTTGTAGAGGTCATTCC 3'

SynATPB9-sense: 5' CCAACGTAATCAACGAACAAAATCTTGCAGAGTCCAAAATTGC 3'

SynATPB9-anti: 5' GCAATTTTGGACTCTGCAAGATTTTGTTCGTTGATTACGTTGG 3'

SynATPB10-sense: 5' ACTTTAAGTACGGAAATGGGTACTTTGCAAGAGCGTATC 3'

SynATPB10-anti: 5' GCAAAGTACCCATTTCCGTACTTAAAGTGGGCTGGTAAC 3'

SynATPB11-sense: 5' ACCATGCTTCAGCCCCGAATCGTTGGGTCAGAG 3'

SynATPB11-anti: 5' CTCTGACCCAACGATTCGGGGCTGAAGCATGGTG 3'

SynATPB12-sense: 5' ACACCGCTCAACAAGTGAAACAAACCCTGCAACGCTAC 3'

SynATPB12-anti: 5' TTGCAGGGTTTGTTCCTTACTTGTGAGCGGTGTCGTAATG 3'

AthATPB5-sense: 5' GCGTGGGTAAAACAGTAATCATGATGGAATTGATCAAC 3'

AthATPB5-anti: 5' GTTGATCAATTCCATCATGATTACTGTTTTACCCACGC 3'

AthATPB8-AD-sense: 5' GAAATGATCTTTACATGGAAATGATCGAATCTGGAGTCATT 3'

AthATPB8-AD-anti: 5' AATGACTCCAGATTCGATCATTTCCATGTAAAGATCATTTTC 3'

AthATPB9-AD-sense: 5' CTGGAGTCATTAATGCAGATAAACCTGAAGAATCCAAAGTGGCC 3' 5'

AthATPB9-AD-anti: 5' GGCCACTTTGGATTCTTCAGGTTTATCTGCATTAATGACTCCAG  
3'
